# Supplementary material
Source: PubMed Central journal article supplement (PMC7039399)
Supplement: NIHMS1541329-supplement-2.pdf [file NIHMS1541329-supplement-2.pdf]

# Supplementary Figure 1

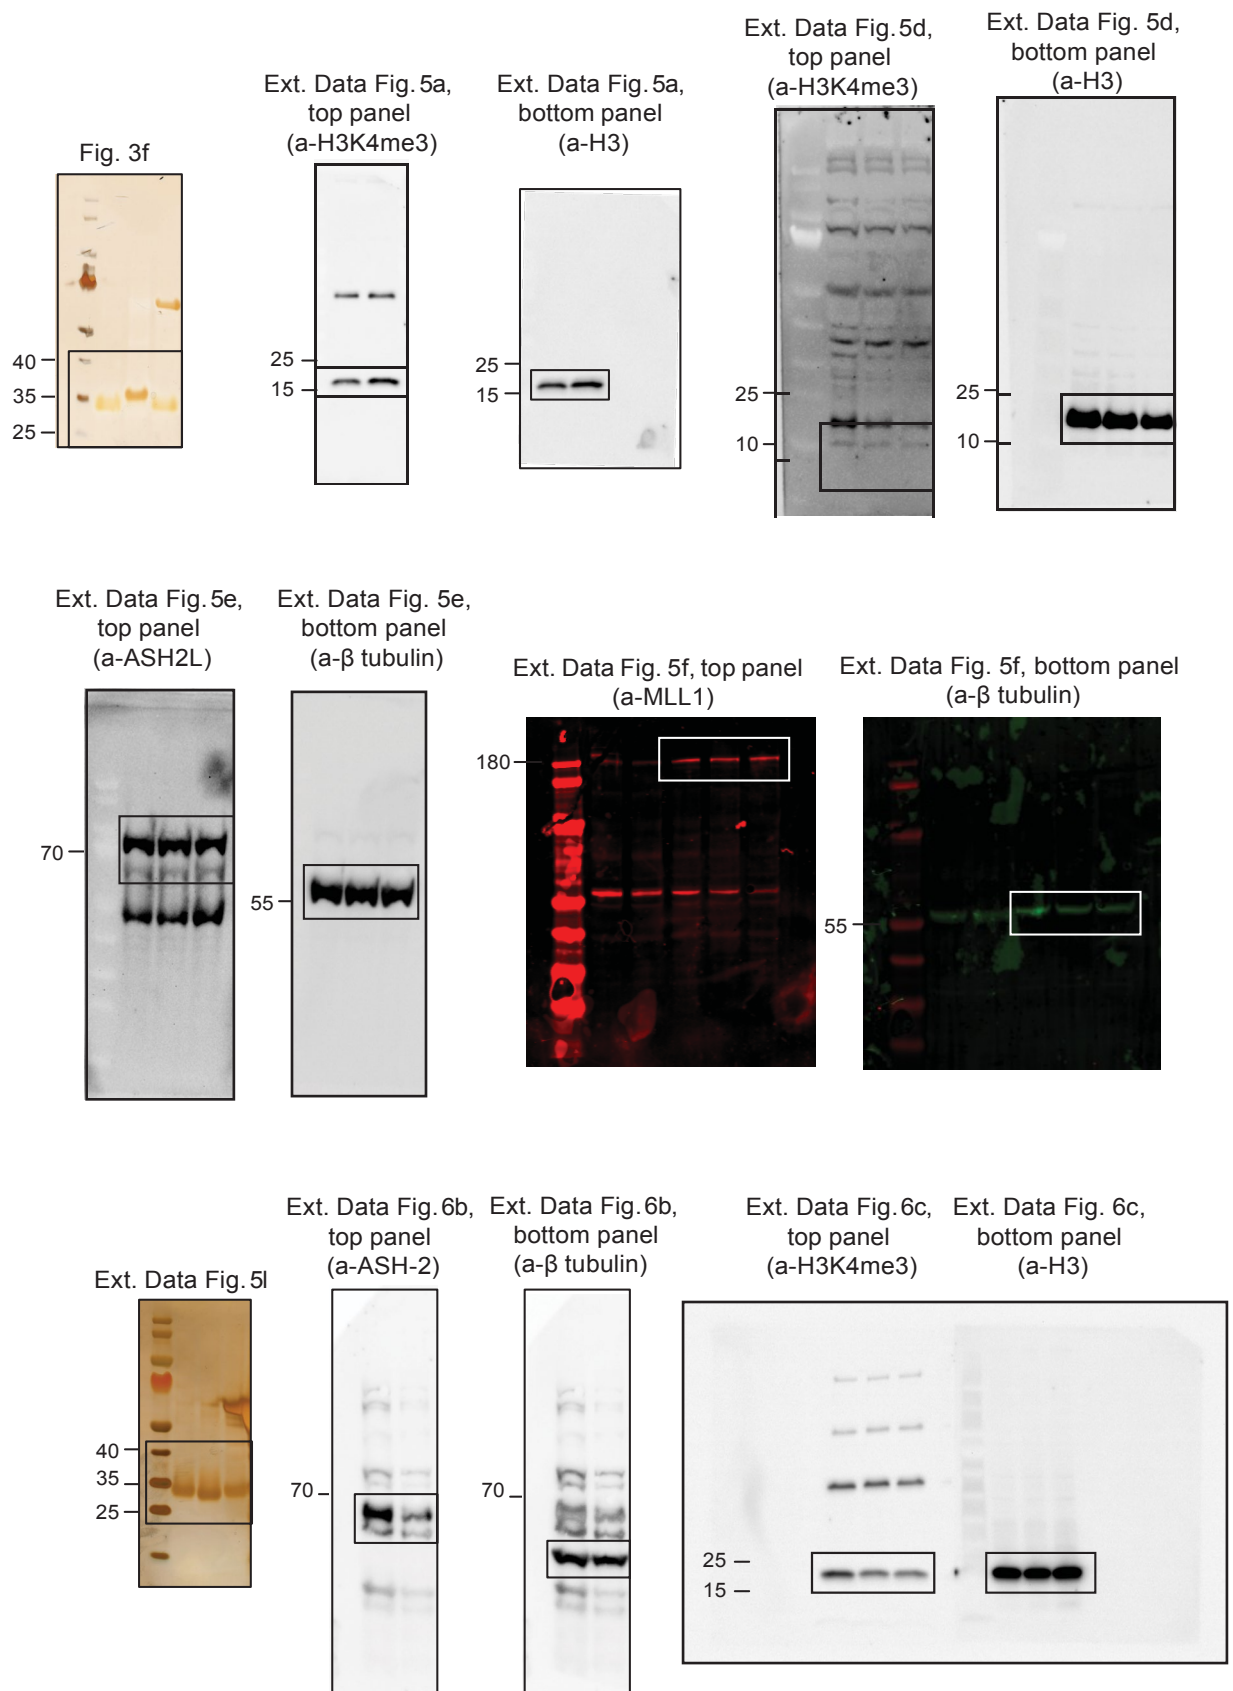

Full gel and blot images.

## Supplementary Figure 2

Fig. 3c, blots used for H3K4me3/H3 quantification

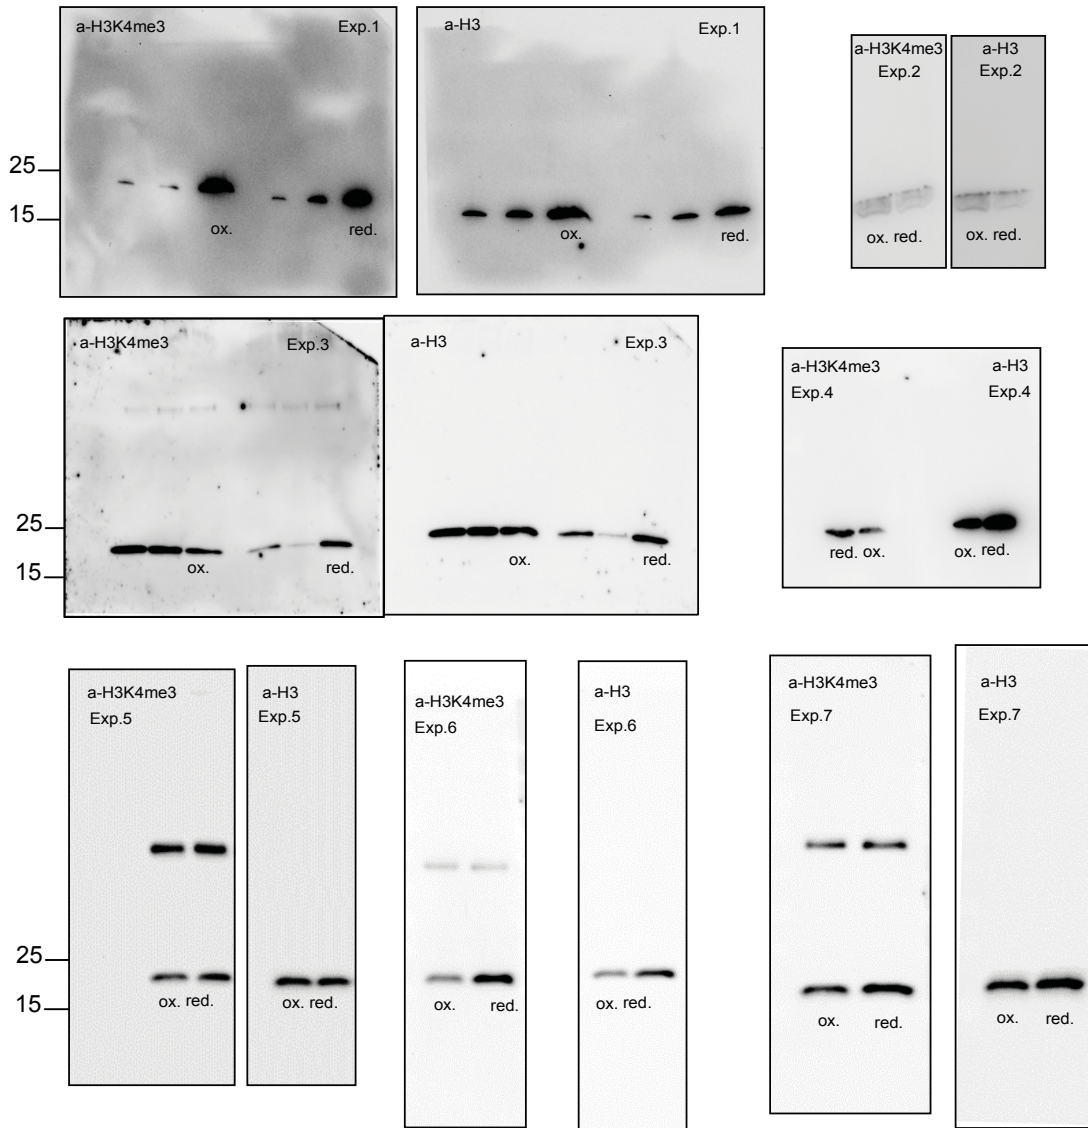

Full gel and blot images.

### Supplementary Figure 3

Fig. 3d, blots used for H3K4me3/H3 quantification

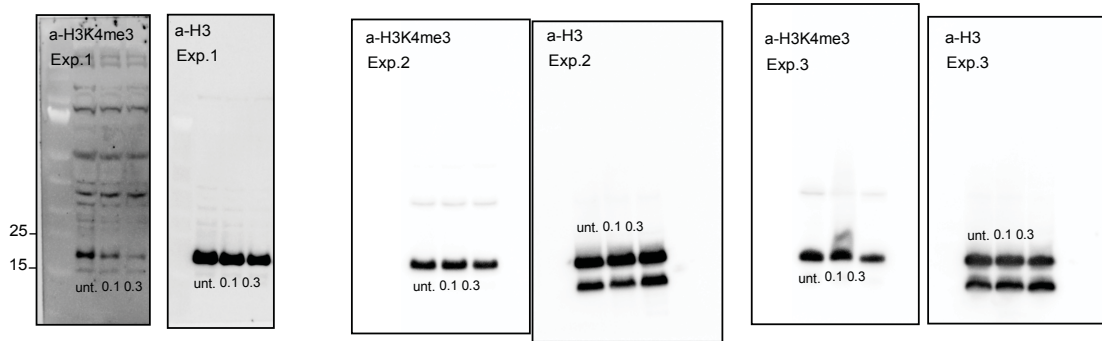

Extended Data Fig. 5b and c, blots used for H3K27ac/H3 and H3K27me3/H3 quantification

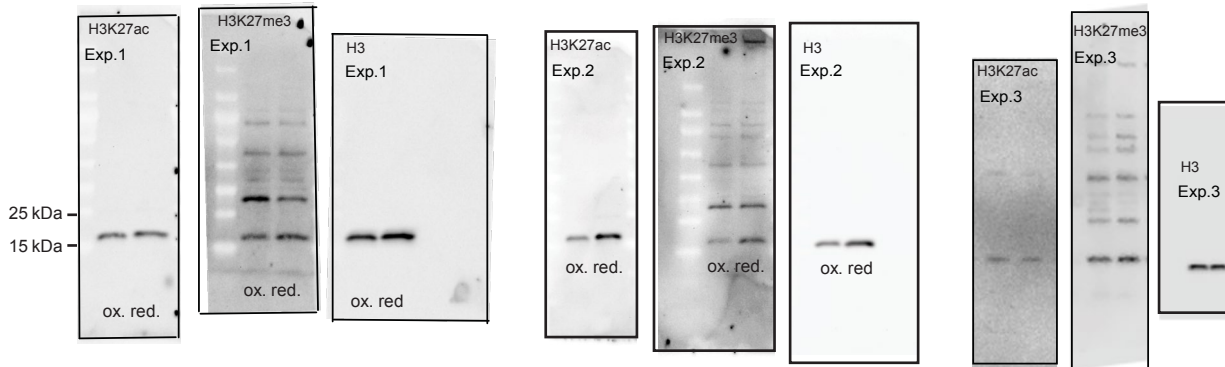

Extended Data Fig. 6d, blots used for ASHL2/ $\beta$ -tubulin quantification

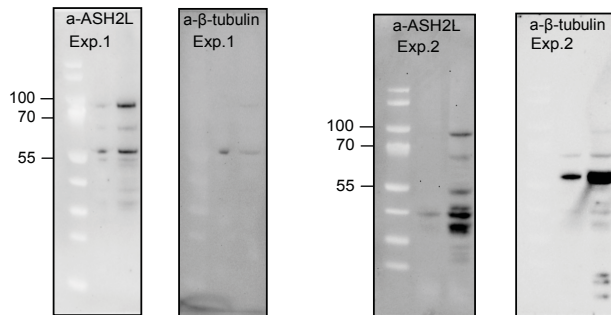

Full gel and blot images.
